# Supplementary material for: Prospective assessment of catheter-associated bacteriuria in nursing home residents: clinical presentation, epidemiology, and colonization dynamics
Source: bioRxiv or medRxiv preprint supplement (doi:10.1101/2020.09.29.20204107), 2021-08-04
Supplement: Supplementary file [file 2020.09.29.20204107-1.pdf]

| Co-colonization per urine specimen              | MRSA (n=81) | MSSA (n=87) | Coagulase-neg | <i>Enterococc</i> | Group B <i>Sti</i> | Misc Pyr- C | <i>Escherichia</i> | <i>Providencic</i> | <i>Providencic</i> | <i>Proteus mi</i> | <i>Proteus vul</i> | <i>Morganellc</i> | <i>Klebsiella o</i> | <i>Klebsiella p</i> | <i>Pseudomor</i> | <i>Pseudomor</i> | <i>Enterobact</i> | <i>Serratia m</i> |
|-------------------------------------------------|-------------|-------------|---------------|-------------------|--------------------|-------------|--------------------|--------------------|--------------------|-------------------|--------------------|-------------------|---------------------|---------------------|------------------|------------------|-------------------|-------------------|
| MRSA (n=81)                                     | x           | 12 (15)~    | 15 (18)       | 66 (81)           | 0 (0)              | 45 (56)*    | 48 (59)*           | 37 (46)            | 14 (17)            | 48 (59)           | 4 (5)              | 22 (27)           | 14 (17)             | 10 (12)             | 27 (33)          | 13 (16)*         | 4 (5)             | 2 (2)~            |
| MSSA (n=87)                                     | 12 (14)~    | x           | 13 (15)       | 68 (78)           | 1 (1)              | 33 (41)     | 37 (46)            | 51 (63)*           | 18 (22)            | 38 (47)           | 1 (1)              | 22 (27)           | 0 (0)               | 5 (6)               | 16 (20)          | 0 (0)            | 0 (0)             | 1 (1)             |
| Coagulase-negative <i>Staphylococcus</i> (n=46) | 15 (32)     | 13 (28)     | x             | 36 (78)           | 0 (0)              | 13 (28)~    | 3 (6)~             | 36 (78)            | 2 (4)              | 33 (72)           | 5 (11)*            | 24 (52)           | 0 (0)               | 6 (13)              | 22 (48)          | 8 (17)*          | 4 (9)             | 2 (4)             |
| <i>Enterococcus faecalis</i> (n=163)            | 66 (40)     | 68 (42)     | 36 (22)       | x                 | 2 (1)              | 61 (37)~    | 82 (50)            | 86 (53)            | 31 (19)            | 93 (57)           | 12 (7)             | 61 (37)           | 16 (10)             | 22 (13)             | 54 (33)          | 20 (12)          | 2 (1)             | 3 (2)~            |
| Group B <i>Streptococcus</i> (n=2)              | 0 (0)       | 1 (50)      | 0 (0)         | 2 (100)           | x                  | 0 (0)       | 1 (50)             | 1 (50)             | 0 (0)              | 1 (50)            | 0 (0)              | 0 (0)             | 0 (0)               | 0 (0)               | 0 (0)            | 0 (0)            | 0 (0)             | 0 (0)             |
| Misc Pyr- Cat- (n=96)                           | 45 (47)*    | 33 (34)     | 13 (13)~      | 61 (63)           | 0 (0)              | x           | 47 (49)            | 60 (62)            | 12 (12)            | 74 (77)*          | 17 (18)            | 35 (36)*          | 14 (15)             | 13 (13)             | 19 (20)          | 11 (11)          | 3 (3)             | 12 (12)           |
| <i>Escherichia coli</i> (n=89)                  | 48 (53)     | 37 (41)     | 3 (3)~        | 82 (92)           | 1 (1)              | 47 (52)     | x                  | 53 (59)            | 32 (36)*           | 45 (51)           | 0 (0)              | 35 (39)*          | 16 (18)             | 6 (7)               | 13 (15)~         | 13 (15)          | 4 (4)             | 0 (0)             |
| <i>Providencia stuartii</i> (n=111)             | 37 (33)     | 51 (46)*    | 36 (32)*      | 86 (77)           | 1 (1)              | 60 (54)*    | 53 (48)            | x                  | 13 (12)            | 80 (72)*          | 4 (4)              | 63 (57)*          | 13 (12)             | 4 (4)~              | 29 (26)~         | 13 (12)          | 4 (4)             | 1 (1)             |
| <i>Providencia retgerri</i> (n=43)              | 14 (33)     | 18 (41)     | 2 (5)         | 31 (72)           | 0 (0)              | 12 (30)     | 32 (74)*           | 13 (30)            | x                  | 8 (19)~           | 3 (7)              | 6 (14)            | 0 (0)               | 4 (9)               | 2 (5)            | 10 (22)          | 0 (0)             | 3 (7)             |
| <i>Proteus mirabilis</i> (n=118)                | 48 (41)     | 38 (32)     | 33 (28)       | 93 (79)           | 1 (1)              | 74 (63)*    | 45 (38)            | 80 (68)*           | 8 (7)~             | x                 | 19 (16)            | 52 (44)           | 14 (12)             | 17 (14)*            | 33 (28)          | 13 (11)          | 0 (0)             | 12 (10)*          |
| <i>Proteus vulgaris</i> (n=37)                  | 4 (11)      | 1 (3)~      | 5 (13)        | 12 (32)           | 0 (0)              | 17 (46)*    | 0 (0)              | 4 (11)             | 3 (8)              | 19 (51)           | x                  | 2 (5)             | 0 (0)               | 9 (24)*             | 2 (5)            | 4 (11)           | 0 (0)             | 11 (30)*          |
| <i>Morganella morganii</i> (n=64)               | 22 (34)     | 22 (34)~    | 24 (37)       | 61 (95)           | 0 (0)              | 35 (54)     | 35 (54)*           | 63 (98)*           | 6 (9)              | 52 (81)           | 2 (3)              | x                 | 13 (20)*            | 4 (6)               | 25 (39)*         | 11 (17)*         | 0 (0)             | 0 (0)             |
| <i>Klebsiella oxytoca</i> (n=16)                | 14 (87)     | 0 (0)       | 0 (0)         | 16 (100)          | 0 (0)              | 14 (87)     | 16 (100)           | 13 (81)            | 0 (0)              | 14 (87)           | 0 (0)              | 13 (81)*          | x                   | 0 (0)               | 7 (44)*          | 1 (6)~           | 2 (12)            | 0 (0)             |
| <i>Klebsiella pneumoniae</i> (n=28)             | 10 (36)     | 5 (18)      | 6 (21)        | 22 (79)           | 0 (0)              | 13 (46)     | 6 (21)             | 4 (14)~            | 4 (14)             | 17 (61)           | 9 (32)*            | 4 (14)            | 0 (0)               | x                   | 10 (36)          | 2 (7)            | 2 (7)             | 2 (7)~            |
| <i>Pseudomonas aeruginosa</i> (n=66)            | 27 (41)     | 16 (24)     | 22 (33)       | 54 (82)           | 0 (0)              | 19 (29)     | 13 (20)~           | 29 (44)            | 2 (3)              | 33 (50)           | 2 (3)              | 25 (38)           | 7 (11)              | 10 (15)             | x                | 6 (9)            | 0 (0)             | 1 (1)             |
| <i>Pseudomonas</i> other (n=24)                 | 13 (54)     | 0 (0)       | 8 (33)        | 20 (83)           | 0 (0)              | 11 (46)     | 13 (54)            | 13 (54)            | 10 (42)*           | 13 (54)           | 4 (17)             | 11 (46)*          | 1 (4)~              | 2 (8)               | 6 (25)           | x                | 0 (0)             | 5 (21)*           |
| <i>Enterobacter aerogenes</i> (n=8)             | 4 (50)      | 0 (0)       | 4 (50)        | 2 (25)            | 0 (0)              | 3 (37)      | 4 (50)             | 4 (50)*            | 0 (0)              | 0 (0)             | 0 (0)              | 0 (0)             | 2 (25)              | 2 (25)*             | 0 (0)            | 0 (0)            | x                 | 0 (0)             |
| <i>Serratia marsescens</i> (n=14)               | 2 (14)      | 1 (7)       | 2 (14)~       | 2 (21)~           | 0 (0)              | 12 (86)     | 0 (0)              | 1 (7)              | 3 (21)*            | 12 (86)*          | 11 (79)*           | 0 (0)             | 0 (0)               | 2 (14)~             | 1 (7)            | 5 (36)*          | 0 (0)             | x                 |

Data represent the nummber (percent) of urine cultures containing the organism in each row that also contained the organisms in each column

Statistical signficance of associations were analyzed by logistic regression with clustering to account for multiple urine samples from each study participant

\*Organism in column is associated with increased odds of co-colonizing with organism in row ( $P < 0.05$ )

~Organism in column is associated with decreased odds of co-colonizing with organism in row ( $P < 0.05$ )

| Co-colonization per participant                 | MRSA (n=9) | MSSA (n=9) | Coagulase-negative <i>Staphylococcus</i> (n=11) | <i>Enterococcus faecalis</i> (n=18) | Group B <i>Streptococcus</i> (n=2) | Misc Pyr- Cat- (n=11) | <i>Escherichia coli</i> (n=8) | <i>Providencia stuartii</i> (n=9) | <i>Providencia rettgeri</i> (n=4) | <i>Proteus mirabilis</i> (n=11) | <i>Proteus vulgaris</i> (n=3) | <i>Morganella morganii</i> (n=5) | <i>Klebsiella oxytoca</i> (n=3) | <i>Klebsiella pneumoniae</i> (n=5) | <i>Pseudomonas aeruginosa</i> (n=8) | <i>Pseudomonas other</i> (n=5) | <i>Enterobacter aerogenes</i> (n=2) | <i>Serratia marsescens</i> (n=2) |
|-------------------------------------------------|------------|------------|-------------------------------------------------|-------------------------------------|------------------------------------|-----------------------|-------------------------------|-----------------------------------|-----------------------------------|---------------------------------|-------------------------------|----------------------------------|---------------------------------|------------------------------------|-------------------------------------|--------------------------------|-------------------------------------|----------------------------------|
| MRSA (n=9)                                      | x          | 3 (33)     | 4 (44)                                          | 8 (89)                              | 0 (0)                              | 6 (67)                | 3 (33)                        | 4 (44)                            | 3 (33)                            | 6 (67)                          | 1 (11)                        | 2 (22)                           | 1 (11)                          | 5 (56)                             | 6 (67)                              | 2 (22)                         | 1 (11)                              | 1 (11)                           |
| MSSA (n=9)                                      | 3 (33)     | x          | 5 (56)                                          | 8 (89)                              | 0 (0)                              | 4 (44)                | 5 (56)                        | 6 (67)                            | 2 (22)                            | 5 (56)                          | 1 (11)                        | 4 (44)                           | 0 (0)                           | 1 (11)                             | 4 (44)                              | 0 (0)                          | 0 (0)                               | 1 (11)                           |
| Coagulase-negative <i>Staphylococcus</i> (n=11) | 4 (36)     | 5 (45)     | x                                               | 9 (82)                              | 0 (0)                              | 3 (27)                | 1 (9)                         | 6 (54)                            | 2 (18)                            | 8 (73)                          | 2 (18)                        | 3 (27)                           | 0 (0)                           | 3 (27)                             | 7 (64)                              | 4 (36)                         | 1 (9)                               | 1 (9)                            |
| <i>Enterococcus faecalis</i> (n=18)             | 8 (44)     | 8 (44)     | 9 (50)                                          | x                                   | 2 (11)                             | 8 (44)                | 8 (44)                        | 8 (44)                            | 4 (22)                            | 9 (50)                          | 3 (17)                        | 5 (28)                           | 2 (11)                          | 5 (28)                             | 8 (44)                              | 4 (22)                         | 1 (6)                               | 2 (11)                           |
| Group B <i>Streptococcus</i> (n=2)              | 0 (0)      | 0 (0)      | 0 (0)                                           | 2 (100)                             | x                                  | 0 (0)                 | 1 (50)                        | 1 (50)                            | 0 (0)                             | 1 (50)                          | 0 (0)                         | 0 (0)                            | 0 (0)                           | 0 (0)                              | 0 (0)                               | 0 (0)                          | 0 (0)                               | 0 (0)                            |
| Misc Pyr- Cat- (n=11)                           | 6 (54)     | 4 (36)     | 3 (27)                                          | 8 (73)                              | 0 (0)                              | x                     | 5 (45)                        | 4 (36)                            | 4 (36)                            | 6 (54)                          | 1 (9)                         | 3 (27)                           | 1 (9)                           | 3 (27)                             | 5 (45)                              | 3 (27)                         | 1 (9)                               | 1 (9)                            |
| <i>Escherichia coli</i> (n=8)                   | 3 (37)     | 5 (65)     | 1 (12)                                          | 8 (100)                             | 1 (12)                             | 5 (65)                | x                             | 4 (50)                            | 3 (37)                            | 5 (65)                          | 0 (0)                         | 3 (37)                           | 2 (25)                          | 2 (25)                             | 3 (37)                              | 2 (25)                         | 1 (12)                              | 0 (0)                            |
| <i>Providencia stuartii</i> (n=9)               | 4 (44)     | 6 (67)     | 6 (67)                                          | 8 (89)                              | 1 (11)                             | 4 (44)                | 4 (44)                        | x                                 | 2 (22)                            | 8 (89)                          | 3 (33)                        | 5 (56)                           | 1 (11)                          | 2 (22)                             | 4 (44)                              | 3 (33)                         | 1 (11)                              | 1 (11)                           |
| <i>Providencia rettgeri</i> (n=4)               | 3 (75)     | 2 (50)     | 2 (50)                                          | 4 (100)                             | 0 (0)                              | 4 (100)               | 3 (75)                        | 2 (50)                            | x                                 | 3 (75)                          | 1 (25)                        | 2 (50)                           | 0 (0)                           | 2 (50)                             | 2 (50)                              | 3 (75)                         | 0 (0)                               | 1 (25)                           |
| <i>Proteus mirabilis</i> (n=11)                 | 6 (54)     | 5 (45)     | 8 (73)                                          | 9 (82)                              | 1 (9)                              | 6 (54)                | 5 (45)                        | 8 (73)                            | 3 (27)                            | x                               | 3 (27)                        | 4 (36)                           | 1 (9)                           | 1 (9)                              | 6 (54)                              | 6 (54)                         | 0 (0)                               | 2 (18)                           |
| <i>Proteus vulgaris</i> (n=3)                   | 1 (33)     | 1 (33)     | 2 (67)                                          | 3 (100)                             | 0 (0)                              | 1 (33)                | 0 (0)                         | 3 (100)                           | 1 (33)                            | 3 (100)                         | x                             | 1 (33)                           | 0 (0)                           | 1 (33)                             | 1 (33)                              | 1 (33)                         | 0 (0)                               | 1 (33)                           |
| <i>Morganella morganii</i> (n=5)                | 2 (40)     | 4 (80)     | 3 (60)                                          | 5 (100)                             | 0 (0)                              | 3 (60)                | 3 (60)                        | 5 (100)                           | 2 (40)                            | 4 (80)                          | 1 (20)                        | x                                | 1 (20)                          | 1 (20)                             | 3 (60)                              | 2 (40)                         | 0 (0)                               | 0 (0)                            |
| <i>Klebsiella oxytoca</i> (n=3)                 | 1 (33)     | 0 (0)      | 0 (0)                                           | 2 (67)                              | 0 (0)                              | 1 (33)                | 2 (67)                        | 1 (33)                            | 0 (0)                             | 1 (33)                          | 0 (0)                         | 1 (33)                           | x                               | 0 (0)                              | 1 (33)                              | 1 (33)                         | 1 (33)                              | 0 (0)                            |
| <i>Klebsiella pneumoniae</i> (n=5)              | 5 (100)    | 1 (20)     | 3 (60)                                          | 5 (100)                             | 0 (0)                              | 3 (60)                | 2 (40)                        | 2 (40)                            | 2 (40)                            | 1 (20)                          | 1 (20)                        | 1 (20)                           | 0 (0)                           | x                                  | 3 (60)                              | 1 (20)                         | 1 (20)                              | 1 (20)                           |
| <i>Pseudomonas aeruginosa</i> (n=8)             | 6 (75)     | 4 (50)     | 7 (87)                                          | 8 (100)                             | 0 (0)                              | 5 (65)                | 3 (37)                        | 4 (50)                            | 2 (25)                            | 6 (75)                          | 1 (12)                        | 3 (37)                           | 1 (12)                          | 3 (37)                             | x                                   | 3 (37)                         | 0 (0)                               | 1 (12)                           |
| <i>Pseudomonas other</i> (n=5)                  | 2 (40)     | 0 (0)      | 4 (80)                                          | 4 (80)                              | 0 (0)                              | 3 (60)                | 2 (40)                        | 3 (60)                            | 3 (60)                            | 5 (100)                         | 1 (20)                        | 2 (40)                           | 1 (20)                          | 1 (20)                             | 3 (60)                              | x                              | 0 (0)                               | 1 (20)                           |
| <i>Enterobacter aerogenes</i> (n=2)             | 1 (50)     | 0 (0)      | 1 (50)                                          | 1 (50)                              | 0 (0)                              | 1 (50)                | 1 (50)                        | 1 (50)                            | 0 (0)                             | 0 (0)                           | 0 (0)                         | 0 (0)                            | 1 (50)                          | 1 (50)                             | 0 (0)                               | 0 (0)                          | x                                   | 0 (0)                            |
| <i>Serratia marsescens</i> (n=2)                | 1 (50)     | 1 (50)     | 1 (50)                                          | 2 (100)                             | 0 (0)                              | 1 (50)                | 0 (0)                         | 1 (50)                            | 1 (50)                            | 2 (100)                         | 1 (50)                        | 0 (0)                            | 0 (0)                           | 1 (50)                             | 1 (50)                              | 1 (50)                         | 0 (0)                               | x                                |

Data represent the nummber (percent) of participants with urine cultures containing the organism in each row that also contained the organisms in each column
